# Supplementary material for: Development of a sequence-based reference physical map of pea (Pisum sativum L.)
Source: bioRxiv preprint, doi:10.1101/518563, version 1 (2019-01-15)
Supplement: Supplemental Table 3 [file 518563_file05.xlsx]

## Sheet: Contigs
Contig ID	Contig	No. of BACs in contig
1	ctg1423	178
2	ctg1129	127
3	ctg11861	4
4	ctg10664	33
5	ctg419	98
6	ctg11843	16
7	ctg11618	94
8	ctg242	152
9	ctg838	36
10	ctg498	54
11	ctg11862	3
12	ctg2486	25
13	ctg2742	86
14	ctg11156	10
15	ctg10021	98
16	ctg10685	9
17	ctg10037	156
18	ctg2124	35
19	ctg11407	25
20	ctg1141	148
21	ctg10299	43
22	ctg10917	30
23	ctg3590	54
24	singleton
25	ctg2185	73
26	ctg348	17
27	ctg11863	4
28	ctg10127	32
29	ctg1567	80
30	ctg10509	72
31	ctg2754	62
32	ctg2337	37
33	ctg1596	134
34	ctg2149	40
35	ctg7138	62
36	ctg774	87
37	ctg344	39
38	ctg11864	3
39	ctg767	41
40	ctg5717	39
41	ctg6067	34
42	ctg162	91
43	ctg7394	6
44	ctg11865	4
45	ctg5232	69
46	ctg11866	3
47	ctg11867	5
48	ctg11251	26
49	ctg1231	73
50	ctg11103	31
51	ctg1363	21
52	ctg1364	221
53	ctg11868	3
54	ctg4169	45
55	ctg11420	32
56	ctg802	185
57	ctg116	24
58	ctg2814	26
59	ctg11869	2
60	ctg6440	55
61	ctg719	145
62	ctg2177	44
63	ctg241	84
64	ctg11532	23
65	ctg1248	17
66	ctg5388	101
67	ctg11870	10
68	ctg238	88
69	ctg5952	75
70	ctg2404	34
71	ctg53	28
72	ctg11726	17
73	ctg647	61
74	ctg654	38
75	ctg893	45
76	ctg9405	25
77	ctg10544	100
78	ctg240	25
79	ctg11241	58
80	ctg4011	84
81	ctg959	35
82	ctg1849	55
83	ctg6316	23
84	ctg2953	52
85	ctg628	216
86	ctg5159	84
87	ctg10783	20
88	ctg11871	3
89	ctg11872	2
90	ctg762	52
91	ctg1786	68
92	ctg10429	115
93	ctg3365	38
94	ctg2918	52
95	ctg11873	4
96	ctg2116	55
97	ctg210	78
98	ctg1337	66
99	ctg1616	178
100	ctg1510	9
101	ctg10096	239
102	ctg1093	101
103	ctg11874	7
104	ctg3341	11
105	ctg11838	22
106	ctg11875	3
107	ctg10024	106
108	ctg799	100
109	ctg1031	86
110	ctg9986	115
111	ctg1080	15
112	ctg176	21
113	ctg2990	41
114	ctg1182	130
115	ctg3028	84
116	ctg11876	2
117	ctg486	123
118	ctg1692	62
119	ctg8662	10
120	ctg11240	68
121	ctg11877	4
122	ctg11878	2
123	ctg11413	20
124	ctg7696	65
125	ctg1809	60
126	ctg912	95
127	ctg10620	7
128	ctg756	236
129	ctg11879	4
130	ctg2247	137
131	ctg1264	76
132	ctg1392	63
133	ctg7489	85
134	ctg786	140
135	ctg1945	85
136	ctg146	12
137	ctg10078	75
138	ctg1137	14
139	ctg4994	24
140	ctg11071	5
141	ctg335	85
142	ctg1874	20
143	ctg1304	68
144	ctg10922	48
145	ctg10796	6
146	ctg1282	54
147	ctg1054	224
148	ctg643	68
149	ctg65	15
150	ctg8560	60
151	ctg963	42
152	ctg2745	93
153	ctg11880	2
154	ctg11881	4
155	ctg1511	95
156	ctg1331	125
157	ctg6070	86
158	ctg1850	48
159	ctg1245	91
160	ctg9921	7
161	ctg11882	4
162	ctg5307	115
163	ctg3361	94
164	ctg2499	44
165	ctg10652	33
166	ctg3531	70
167	ctg2634	52
168	ctg11498	24
169	ctg2599	40
170	ctg11883	2
171	ctg5509	85
172	ctg1769	57
173	ctg1127	64
174	ctg1644	17
175	ctg16805	3
176	ctg11214	29
177	ctg175	100
178	ctg6362	72
179	ctg10314	34
180	ctg8782	11
181	ctg11884	4
182	ctg1345	17
183	ctg219	157
184	ctg1621	48
185	ctg11885	2
186	ctg11227	188
187	ctg11886	2
188	ctg5206	17
189	ctg11887	3
190	ctg11654	37
191	ctg11888	2
192	ctg11889	2
193	ctg8659	40
194	ctg11890	8
195	ctg416	91
196	ctg5556	118
197	ctg11891	6
198	ctg11331	31
199	ctg160	19
200	ctg11892	4
201	ctg11893	6
202	ctg556	95
203	ctg48	128
204	ctg2132	12
205	ctg11894	5
206	ctg11895	3
207	ctg896	34
208	ctg3490	66
209	ctg10487	38
210	ctg1461	103
211	ctg10537	73
212	ctg56	29
213	ctg363	12
214	ctg191	177
215	ctg1297	137
216	ctg23	97
217	ctg2397	82
218	ctg11896	5
219	ctg8954	48
220	ctg1315	16
221	ctg1451	116
222	ctg1183	58
223	ctg11897	3
224	ctg351	126
225	ctg4369	19
226	ctg9395	14
227	ctg536	227
228	ctg11898	6
229	ctg1046	83
230	ctg4293	85
231	ctg10753	8
232	ctg10591	25
233	ctg11072	32
234	ctg516	20
235	ctg10382	53
236	ctg10369	36
237	ctg3337	79
238	ctg7610	56
239	ctg10793	45
240	ctg10735	126
241	ctg5696	45
242	ctg9993	45
243	ctg8223	59
244	ctg70	27
245	ctg11715	17
246	ctg11126	15
247	ctg10268	127
248	ctg9542	77
249	ctg10372	38
250	ctg11899	4
251	ctg2999	58
252	ctg4098	4
253	ctg1498	46
254	ctg11900	3
255	ctg10443	43
256	ctg11136	69
257	ctg534	22
258	ctg11901	5
259	ctg3090	28
260	ctg1023	178
261	ctg10284	65
262	ctg5734	142
263	ctg11377	43
264	ctg1538	82
265	ctg2236	137
266	ctg7619	92
267	ctg1000	15
268	ctg10669	10
269	ctg205	86
270	ctg3280	9
271	ctg4423	88
272	ctg11430	9
273	ctg515	86
274	ctg17244	7
275	ctg10353	67
276	ctg20	118
277	ctg11290	72
278	ctg15579	8
279	ctg3322	75
280	ctg228	19
281	ctg9152	10
282	ctg10431	31
283	ctg11902	5
284	ctg11903	4
285	ctg338	133
286	ctg11904	5
287	ctg385	68
288	ctg749	10
289	ctg10665	91
290	ctg10650	51
291	ctg4932	33
292	ctg961	64
293	ctg10346	84
294	ctg99	120
295	ctg1108	12
296	ctg10770	20
297	ctg11905	5
298	ctg11906	4
299	ctg773	45
300	ctg11907	5
301	ctg3159	34
302	ctg17532	7
303	ctg11760	11
304	ctg10063	39
305	ctg1635	91
306	ctg11483	53
307	ctg1326	22
308	ctg10418	23
309	ctg1488	58
310	ctg11908	3
311	ctg2380	23
312	ctg11909	6
313	ctg1196	33
314	ctg10376	67
315	ctg2764	28
316	ctg10262	96
317	ctg6396	14
318	ctg2875	45
319	ctg11910	3
320	ctg4704	16
321	ctg11090	14
322	ctg11911	9
323	ctg1105	21
324	ctg10859	97
325	ctg3116	93
326	ctg7973	85
327	ctg1876	61
328	ctg9988	42
329	ctg502	15
330	ctg237	65
331	ctg11299	102
332	ctg7485	35
333	ctg11053	11
334	ctg10740	18
335	ctg10432	25
336	ctg4043	26
337	ctg10681	25
338	ctg10540	61
339	ctg10128	38
340	ctg10028	12
341	ctg1690	60
342	ctg455	58
343	ctg920	66
344	ctg10688	31
345	ctg794	52
346	ctg11912	4
347	ctg1313	29
348	ctg52	19
349	ctg2961	40
350	ctg11365	60
351	ctg11678	67
352	ctg11582	21
353	ctg24	237
354	ctg485	90
355	ctg11144	44
356	ctg1913	31
357	ctg10475	60
358	ctg11913	12
359	ctg11914	6
360	ctg1734	26
361	ctg670	240
362	ctg167	65
363	ctg609	90
364	ctg2720	104
365	ctg4128	36
366	ctg686	129
367	ctg9110	32
368	ctg533	56
369	ctg11513	22
370	ctg11915	5
371	ctg11916	6
372	ctg11363	55
373	ctg10169	2
374	ctg11917	3
375	ctg9126	12
376	ctg266	65
377	ctg4511	89
378	ctg11918	5
379	ctg1995	113
380	ctg10153	70
381	ctg114	112
382	ctg11731	27
383	ctg6311	16
384	ctg4684	34
385	ctg3390	28
386	ctg805	158
387	ctg1204	17
388	ctg11919	6
389	ctg10708	106
390	ctg11019	58
391	ctg10329	43
392	ctg3394	27
393	ctg10779	22
394	ctg3256	50
395	ctg464	74
396	ctg10313	63
397	ctg2110	113
398	ctg7510	75
399	ctg164	21
400	ctg7254	31
401	ctg10675	41
402	ctg4309	23
403	ctg7791	144
404	ctg11920	7
405	ctg11657	114
406	ctg10720	35
407	ctg924	48
408	ctg11921	3
409	ctg547	71
410	ctg10109	55
411	ctg382	91
412	ctg6032	39
413	ctg1891	24
414	ctg10186	33
415	ctg4468	174
416	ctg8627	29
417	ctg9367	47
418	ctg8380	21
419	ctg10539	9
420	ctg2130	23
421	ctg8600	21
422	ctg5446	42
423	ctg652	56
424	ctg31	186
425	ctg1474	80
426	ctg1577	56
427	ctg11922	8
428	ctg10131	73
429	ctg10603	26
430	ctg1058	25
431	ctg10712	60
432	ctg11037	21
433	ctg3164	78
434	ctg11923	7
435	ctg861	71
436	ctg2080	36
437	ctg11924	5
438	ctg1732	182
439	ctg875	91
440	ctg9072	43
441	ctg11925	4
442	ctg9927	38
443	ctg3138	57
444	ctg2038	28
445	ctg340	25
446	ctg11382	113
447	ctg491	119
448	ctg10858	69
449	ctg7921	5
450	ctg1772	108
451	ctg659	131
452	ctg9305	20
453	ctg2172	5
454	ctg10273	100
455	ctg11926	2
456	ctg1752	132
457	ctg11419	50
458	ctg11927	11
459	ctg1360	32
460	ctg11928	3
461	ctg2019	12
462	ctg129	62
463	ctg11929	3
464	ctg243	46
465	ctg11930	8
466	ctg2728	46
467	ctg5601	39
468	ctg1441	20
469	ctg1967	94
470	ctg1937	27
471	ctg727	60
472	ctg3186	14
473	ctg5894	62
474	ctg1632	45
475	ctg3225	8
476	ctg11931	7
477	ctg11131	15
478	ctg10040	148
479	ctg11932	2
480	ctg10200	54
481	ctg1203	55
482	ctg2685	132
483	ctg19098	3
484	ctg11933	11
485	ctg1651	80
486	ctg10825	32
487	ctg11934	6
488	ctg2752	78
489	ctg296	52
490	ctg5469	23
491	ctg6263	61
492	ctg11324	46
493	ctg7792	29
494	ctg5700	68
495	ctg6963	57
496	ctg9989	78
497	ctg11935	12
498	ctg10199	9
499	ctg11936	7
500	ctg216	33
501	ctg1041	61
502	ctg637	108
503	ctg1611	43
504	ctg109	129
505	ctg1961	28
506	ctg11937	3
507	ctg11938	3
508	ctg2824	15
509	ctg9474	78
510	ctg11225	72
511	ctg3232	66
512	ctg3767	49
513	ctg5748	27
514	ctg2971	107
515	ctg1580	56
516	ctg10236	27
517	ctg11033	27
518	ctg33	46
519	ctg2533	45
520	ctg2438	138
521	ctg8588	66
522	ctg11451	49
523	ctg11939	8
524	ctg10795	13
525	ctg11444	21
526	ctg6819	135
527	ctg2582	28
528	ctg17266	3
529	ctg813	48
530	ctg11245	62
531	ctg11940	6
532	ctg11941	8
533	ctg2476	25
534	ctg11942	6
535	ctg10282	67
536	ctg6363	7
537	ctg11943	7
538	ctg1810	57
539	ctg5072	33
540	ctg8754	17
541	ctg6540	7
542	ctg3383	139
543	ctg8687	59
544	ctg899	56
545	ctg11944	6
546	ctg304	129
547	ctg330	59
548	ctg11945	5
549	ctg10742	38
550	ctg11946	4
551	ctg11947	2
552	ctg11007	102
553	ctg451	23
554	ctg11948	6
555	ctg1138	22
556	ctg2894	101
557	ctg5969	16
558	ctg1868	43
559	ctg150	45
560	ctg706	18
561	ctg2227	8
562	ctg6028	40
563	ctg11210	33
564	ctg10469	138
565	ctg6401	27
566	ctg11949	2
567	ctg10476	119
568	ctg134	82
569	ctg717	59
570	ctg11950	9
571	ctg6989	17
572	ctg508	42
573	ctg2867	12
574	ctg10083	37
575	ctg8522	21
576	ctg394	192
577	ctg10515	56
578	ctg10592	83
579	ctg2031	21
580	ctg10525	29
581	ctg798	76
582	ctg10269	24
583	ctg11951	2
584	ctg10671	38
585	ctg10241	86
586	ctg3114	34
587	ctg5047	27
588	ctg7713	42
589	ctg10533	9
590	ctg10207	12
591	ctg295	148
592	ctg4166	63
593	ctg10161	119
594	ctg11353	44
595	ctg10748	21
596	ctg6220	74
597	ctg5170	18
598	ctg948	10
599	ctg1534	78
600	ctg642	72
601	ctg5835	36
602	ctg3689	48
603	ctg2260	126
604	ctg87	33
605	ctg11484	46
606	ctg1750	34
607	ctg11952	3
608	ctg5042	16
609	ctg3492	79
610	ctg148	13
611	ctg526	115
612	ctg945	11
613	ctg11629	47
614	ctg7378	18
615	ctg11506	39
616	ctg10157	11
617	ctg11953	2
618	ctg2594	37
619	ctg11954	4
620	ctg11489	63
621	ctg11381	28
622	ctg640	85
623	ctg3647	57
624	ctg339	141
625	ctg1250	27
626	ctg352	55
627	ctg11955	5
628	ctg11956	4
629	ctg11164	67
630	ctg11514	22
631	ctg10951	23
632	ctg8602	85
633	ctg3810	85
634	ctg270	158
635	ctg214	38
636	ctg2630	33
637	ctg11590	19
638	ctg11237	38
639	ctg10840	75
640	ctg3367	32
641	ctg11957	6
642	ctg374	25
643	ctg16978	12
644	ctg2217	67
645	ctg6355	24
646	ctg10020	34
647	ctg3059	86
648	ctg1437	13
649	ctg7881	41
650	ctg1019	94
651	ctg3630	10
652	ctg10754	4
653	ctg3863	80
654	ctg10585	137
655	ctg10301	49
656	ctg709	25
657	ctg11958	9
658	ctg8584	54
659	ctg1846	31
660	ctg11722	23
661	ctg11959	7
662	ctg1294	75
663	ctg165	142
664	ctg9902	84
665	ctg2507	29
666	ctg2285	74
667	ctg8350	47
668	ctg771	66
669	ctg11960	3
670	ctg11385	10
671	ctg8668	51
672	ctg4919	23
673	ctg11411	23
674	ctg11961	4
675	ctg4003	37
676	ctg6146	49
677	ctg373	191
678	ctg11482	73
679	ctg1316	96
680	ctg1921	72
681	ctg1977	48
682	ctg4397	37
683	ctg2343	25
684	ctg2708	59
685	ctg1824	24
686	ctg10983	32
687	ctg5967	55
688	ctg1493	54
689	ctg2872	15
690	ctg4097	7
691	ctg7795	121
692	ctg1851	54
693	ctg11962	3
694	ctg11963	8
695	ctg10067	23
696	ctg8245	23
697	ctg10941	35
698	ctg10927	57
699	ctg10030	50
700	ctg2377	162
701	ctg3153	29
702	ctg10562	31
703	ctg7981	79
704	ctg11964	6
705	ctg11965	6
706	ctg11336	45
707	ctg11966	5
708	ctg10491	97
709	ctg309	124
710	ctg11967	2
711	ctg4050	67
712	ctg264	81
713	ctg11968	2
714	ctg10135	53
715	ctg530	75
716	ctg11969	3
717	ctg2430	25
718	ctg722	55
719	ctg11355	23
720	ctg11970	5
721	ctg275	129
722	ctg145	72
723	ctg3550	79
724	ctg1433	15
725	ctg1698	66
726	ctg10121	126
727	ctg12457	6
728	ctg1930	9
729	ctg8367	32
730	ctg11971	6
731	ctg230	76
732	ctg2951	43
733	ctg11849	12
734	ctg10574	53
735	ctg11972	4
736	ctg11973	4
737	ctg1678	153
738	ctg10300	37
739	ctg3658	46
740	ctg1027	75
741	ctg1104	83
742	ctg10857	24
743	ctg10565	30
744	ctg2307	41
745	ctg2191	143
746	ctg11009	12
747	ctg10767	83
748	ctg11716	19
749	ctg4710	24
750	ctg4370	18
751	ctg594	134
752	ctg6452	68
753	ctg4118	82
754	ctg1230	149
755	ctg11974	2
756	ctg10716	15
757	ctg4864	15
758	ctg11975	3
759	ctg11555	22
760	ctg10621	20
761	ctg11976	5
762	ctg677	32
763	ctg11025	36
764	ctg5258	20
765	ctg1132	47
766	ctg2178	364
767	ctg8054	31
768	ctg1180	38
769	ctg11977	4
770	ctg16108	8
771	ctg1073	91
772	ctg4731	75
773	ctg7863	51
774	ctg11607	12
775	ctg8348	18
776	ctg11978	4
777	ctg1641	138
778	ctg11979	3
779	ctg10802	21
780	ctg10996	58
781	ctg11980	4
782	ctg11981	4
783	ctg10219	55
784	ctg11982	5
785	ctg1615	128
786	ctg2795	145
787	ctg11661	39
788	ctg4090	97
789	ctg11983	8
790	ctg11984	2
791	ctg11985	2
792	ctg2166	39
793	ctg5642	27
794	ctg2579	25
795	ctg11454	22
796	ctg5371	44
797	ctg523	13
798	ctg1788	84
799	ctg5097	9
800	ctg7268	55
801	ctg11986	4
802	ctg10894	33
803	ctg11987	8
804	ctg6485	17
805	ctg1362	61
806	ctg10347	34
807	ctg11828	25
808	ctg11988	2
809	ctg10658	17
810	ctg618	31
811	ctg11137	6
812	ctg766	136
813	ctg11728	37
814	ctg6197	95
815	ctg11550	12
816	ctg11989	9
817	ctg1077	73
818	ctg6327	40
819	ctg7521	17
820	ctg5984	23
821	ctg1323	81
822	ctg11611	24
823	ctg11990	3
824	ctg11991	5
825	ctg10838	59
826	ctg14845	4
827	ctg11992	5
828	ctg32	124
829	ctg421	105
830	ctg10316	47
831	ctg10760	47
832	ctg965	47
833	ctg11993	2
834	ctg6625	24
835	ctg11994	5
836	ctg11995	5
837	ctg11996	2
838	ctg11997	6
839	ctg7359	20
840	ctg11998	6
841	ctg11999	4
842	ctg1405	46
843	ctg10451	57
844	ctg2861	34
845	ctg10556	16
846	ctg268	15
847	ctg10631	22
848	ctg10177	29
849	ctg3746	33
850	ctg2044	18
851	ctg8991	34
852	ctg11805	13
853	ctg12000	5
854	ctg10295	51
855	ctg1194	46
856	ctg1987	43
857	ctg8088	7
858	ctg12001	8
859	ctg1501	82
860	ctg15825	5
861	ctg12002	4
862	ctg5310	44
863	ctg2774	133
864	ctg6436	13
865	ctg10646	45
866	ctg5431	18
867	ctg7853	124
868	ctg11064	32
869	ctg11488	16
870	ctg10174	29
871	ctg3785	14
872	ctg660	14
873	ctg4926	25
874	ctg10396	10
875	ctg758	145
876	ctg9909	56
877	ctg7975	129
878	ctg12003	2
879	ctg4111	43
880	ctg3955	99
881	ctg4585	68
882	ctg2985	53
883	ctg10399	59
884	ctg1785	22
885	ctg10148	69
886	ctg11051	13
887	ctg2214	96
888	ctg12004	7
889	ctg10145	9
890	ctg12005	2
891	ctg431	40
892	ctg6033	7
893	ctg11188	9
894	ctg1482	23
895	ctg6215	17
896	ctg18	20
897	ctg10025	17
898	ctg12006	9
899	ctg12007	2
900	ctg10087	93
901	ctg4944	20
902	ctg229	40
903	ctg2070	41
904	ctg3636	23
905	ctg12008	2
906	ctg10797	35
907	ctg2315	6
908	ctg1708	90
909	ctg4738	84
910	ctg12009	2
911	ctg819	177
912	ctg11734	20
913	ctg153	118
914	ctg386	20
915	ctg11640	46
916	ctg2213	49
917	ctg1178	59
918	ctg12010	7
919	ctg11651	26
920	ctg10943	39
921	ctg1688	87
922	ctg10696	79
923	ctg231	16
924	ctg2015	31
925	ctg3230	32
926	ctg3733	59
927	ctg11182	18
928	ctg12011	2
929	ctg808	74
930	ctg10766	34
931	ctg364	39
932	ctg7137	8
933	ctg1388	46
934	ctg10280	42
935	ctg8062	32
936	ctg1762	56
937	ctg11005	20
938	ctg2643	45
939	ctg3571	11
940	ctg2440	32
941	ctg8059	84
942	ctg596	76
943	ctg1280	12
944	ctg15484	3
945	ctg822	26
946	ctg9918	37
947	ctg3378	100
948	ctg12012	3
949	ctg453	33
950	ctg2830	34
951	ctg2327	83
952	ctg11756	15
953	ctg1600	49
954	ctg12013	2
955	ctg7447	63
956	ctg11197	15
957	ctg4046	15
958	ctg10814	30
959	ctg4607	39
960	ctg11270	71
961	ctg5195	59
962	ctg10686	140
963	ctg16852	5
964	ctg1103	38
965	ctg2646	40
966	ctg1525	16
967	ctg11108	36
968	ctg12014	6
969	ctg12015	4
970	ctg123	109
971	ctg5785	62
972	ctg7871	10
973	ctg12016	3
974	ctg8377	23
975	ctg525	46
976	ctg10293	53
977	ctg12017	4
978	ctg923	59
979	ctg12018	4
980	ctg2686	117
981	ctg12019	4
982	ctg288	155
983	ctg12020	3
984	ctg1070	28
985	ctg5474	41
986	ctg12021	2
987	ctg499	70
988	ctg6623	27
989	ctg1287	21
990	ctg1366	51
991	ctg12022	2
992	ctg2207	62
993	ctg12023	3
994	ctg8091	12
995	ctg12024	3
996	ctg11246	38
997	ctg141	13
998	ctg10773	27
999	ctg2941	121
1000	ctg11297	26
1001	ctg5376	84
1002	ctg610	108
1003	ctg1156	97
1004	ctg11427	63
1005	ctg753	354
1006	ctg173	194
1007	ctg1052	77
1008	ctg220	36
1009	ctg9946	31
1010	ctg1273	49
1011	ctg3197	51
1012	ctg12025	8
1013	ctg10817	6
1014	ctg5780	35
1015	ctg200	31
1016	ctg12026	2
1017	ctg10661	54
1018	ctg661	19
1019	ctg1883	14
1020	ctg750	120
1021	ctg2270	56
1022	ctg4817	34
1023	ctg2088	52
1024	ctg4401	22
1025	ctg10400	80
1026	ctg1823	24
1027	ctg590	42
1028	ctg3828	28
1029	ctg10099	48
1030	ctg5053	79
1031	ctg1126	88
1032	ctg12027	2
1033	ctg10555	35
1034	ctg736	69
1035	ctg12028	5
1036	ctg15238	4
1037	ctg8826	27
1038	ctg11429	11
1039	ctg12096	5
1040	ctg3506	62
1041	ctg890	158
1042	ctg12029	4
1043	ctg10964	33
1044	ctg12030	2
1045	ctg6186	21
1046	ctg2785	106
1047	ctg8679	13
1048	ctg10875	17
1049	ctg10640	11
1050	ctg683	46
1051	ctg316	48
1052	ctg2094	87
1053	ctg12031	2
1054	ctg1383	6
1055	ctg6257	97
1056	ctg1212	33
1057	ctg1210	26
1058	ctg10750	18
1059	ctg333	26
1060	ctg9940	84
1061	ctg11148	14
1062	ctg1309	84
1063	ctg5880	28
1064	ctg12032	3
1065	ctg12033	4
1066	ctg197	136
1067	ctg721	153
1068	ctg139	92
1069	ctg8833	24
1070	ctg10551	52
1071	ctg10124	6
1072	ctg2657	46
1073	ctg5471	23
1074	ctg9932	13
1075	ctg2195	138
1076	ctg5841	27
1077	ctg935	12
1078	ctg12034	2
1079	ctg1088	32
1080	ctg1935	69
1081	ctg3451	33
1082	ctg634	69
1083	ctg2129	58
1084	ctg14056	8
1085	ctg4158	4
1086	ctg11120	55
1087	ctg207	104
1088	ctg873	59
1089	ctg12035	9
1090	ctg12036	3
1091	ctg962	5
1092	ctg3104	26
1093	ctg36	80
1094	ctg858	44
1095	ctg11122	42
1096	ctg12037	7
1097	ctg10296	12
1098	ctg151	29
1099	ctg9205	7
1100	ctg12038	4
1101	ctg12039	6
1102	ctg10485	13
1103	ctg12040	7
1104	ctg12041	4
1105	ctg12042	6
1106	ctg10069	28
1107	ctg1778	139
1108	ctg8237	34
1109	ctg10340	30
1110	ctg12043	4
1111	ctg12044	5
1112	ctg422	50
1113	ctg2338	37
1114	ctg1286	49
1115	ctg886	146
1116	ctg1133	44
1117	ctg10910	23
1118	ctg10420	30
1119	ctg74	53
1120	ctg2257	132
1121	ctg2484	46
1122	ctg11426	7
1123	ctg685	62
1124	ctg529	111
1125	ctg1484	43
1126	ctg10059	98
1127	ctg2405	51
1128	ctg12045	2
1129	ctg12046	3
1130	ctg936	50
1131	ctg10446	34
1132	ctg10358	23
1133	ctg663	109
1134	ctg11172	17
1135	ctg3387	62
1136	ctg10339	55
1137	ctg8291	58
1138	ctg12047	7
1139	ctg12048	7
1140	ctg12049	3
1141	ctg921	74
1142	ctg10191	39
1143	ctg3115	60
1144	ctg2087	30
1145	ctg8873	14
1146	ctg400	94
1147	ctg10877	21
1148	ctg9939	66
1149	ctg5078	173
1150	ctg601	75
1151	ctg10697	22
1152	ctg8892	53
1153	ctg10023	102
1154	ctg5572	11
1155	ctg4362	23
1156	ctg5069	180
1157	ctg12050	4
1158	ctg12051	5
1159	ctg9981	68
1160	ctg7337	21
1161	ctg10925	78
1162	ctg12052	3
1163	ctg11061	14
1164	ctg11321	59
1165	ctg4641	5
1166	ctg10056	32
1167	ctg3986	89
1168	ctg2835	42
1169	ctg11300	16
1170	ctg3980	50
1171	ctg11124	13
1172	ctg12053	5
1173	ctg2411	43
1174	ctg413	69
1175	ctg2155	73
1176	ctg12054	6
1177	ctg3210	45
1178	ctg11314	25
1179	ctg12055	9
1180	ctg11257	69
1181	ctg10397	76
1182	ctg12056	3
1183	ctg3889	84
1184	ctg11062	13
1185	ctg461	140
1186	ctg11236	113
1187	ctg844	13
1188	ctg1427	29
1189	ctg10081	58
1190	ctg11438	18
1191	ctg12057	6
1192	ctg1791	58
1193	ctg3277	12
1194	ctg12058	5
1195	ctg12059	2
1196	ctg4911	9
1197	ctg9962	54
1198	ctg12060	4
1199	ctg12061	2
1200	ctg2641	9
1201	ctg10193	53
1202	ctg11387	27
1203	ctg879	92
1204	ctg10315	21
1205	ctg2251	61
1206	ctg12062	5
1207	ctg10785	28
1208	ctg1528	6
1209	ctg2055	84
1210	ctg3922	50
1211	ctg10302	30
1212	ctg10405	45
1213	ctg3177	75
1214	ctg12063	2
1215	ctg11813	9
1216	ctg7227	56
1217	ctg11350	12
1218	ctg2697	122
1219	ctg6957	32
1220	ctg147	84
1221	ctg888	80
1222	ctg3334	66
1223	ctg2497	23
1224	ctg929	41
1225	ctg11664	20
1226	ctg7959	84
1227	ctg7691	13
1228	ctg12064	3
1229	ctg8628	23
1230	ctg11540	16
1231	ctg1181	40
1232	ctg10950	77
1233	ctg10079	99
1234	ctg1733	59
1235	ctg725	63
1236	ctg259	62
1237	ctg11556	56
1238	ctg12065	3
1239	ctg1034	31
1240	ctg5022	57
1241	ctg11727	25
1242	ctg5436	45
1243	ctg8235	11
1244	ctg10386	35
1245	ctg10918	53
1246	ctg974	30
1247	ctg3757	23
1248	ctg277	21
1249	ctg779	52
1250	ctg4540	97
1251	ctg2825	9
1252	ctg3456	139
1253	ctg3407	59
1254	ctg95	124
1255	ctg6223	36
1256	ctg11842	29
1257	ctg10196	44
1258	ctg1373	60
1259	ctg576	119
1260	ctg12066	3
1261	ctg7904	22
1262	ctg380	57
1263	ctg10192	41
1264	ctg11500	45
1265	ctg5314	78
1266	ctg12067	4
1267	ctg4325	8
1268	ctg5261	23
1269	ctg3699	24
1270	ctg3147	49
1271	ctg519	79
1272	ctg10645	13
1273	ctg7613	7
1274	ctg12068	6
1275	ctg538	95
1276	ctg8215	5
1277	ctg10237	69
1278	ctg1275	27
1279	ctg3393	98
1280	ctg1239	104
1281	ctg122	53
1282	ctg4588	119
1283	ctg11032	74
1284	ctg11546	7
1285	ctg8119	83
1286	ctg10479	16
1287	ctg218	48
1288	ctg4391	70
1289	ctg299	41
1290	ctg877	66
1291	ctg11372	37
1292	ctg267	41
1293	ctg6490	68
1294	ctg10873	73
1295	ctg10283	38
1296	ctg10878	25
1297	ctg11844	13
1298	ctg12069	4
1299	ctg6397	23
1300	ctg12070	2
1301	ctg39	19
1302	ctg911	17
1303	ctg10985	20
1304	ctg12071	6
1305	ctg11097	38
1306	ctg718	62
1307	ctg221	131
1308	ctg12072	3
1309	ctg425	53
1310	ctg592	17
1311	ctg5179	22
1312	ctg1042	74
1313	ctg2096	13
1314	ctg10437	71
1315	ctg8	28
1316	ctg481	35
1317	ctg830	31
1318	ctg10820	43
1319	ctg482	53
1320	ctg368	67
1321	ctg11342	34
1322	ctg476	100
1323	ctg465	77
1324	ctg12073	4
1325	ctg3374	19
1326	ctg9994	83
1327	ctg2047	111
1328	ctg12074	2
1329	ctg12075	2
1330	ctg6123	21
1331	ctg2060	44
1332	ctg12076	8
1333	ctg10899	44
1334	ctg10205	34
1335	ctg3421	9
1336	ctg2593	44
1337	ctg10762	38
1338	ctg10600	34
1339	ctg1867	14
1340	ctg2741	70
1341	ctg3120	80
1342	ctg10010	24
1343	ctg12836	3
1344	ctg1235	48
1345	ctg5394	26
1346	ctg2779	70
1347	ctg8153	9
1348	ctg2489	56
1349	ctg11396	28
1350	ctg462	60
1351	ctg12077	5
1352	ctg10270	92
1353	ctg8688	6
1354	ctg12078	8
1355	ctg3511	12
1356	ctg12079	3
1357	ctg889	6
1358	ctg11332	44
1359	ctg427	105
1360	ctg2591	38
1361	ctg115	107
1362	ctg12080	8
1363	ctg182	97
1364	ctg290	170
1365	ctg6166	28
1366	ctg10371	36
1367	ctg9953	9
1368	ctg10719	23
1369	ctg10805	20
1370	ctg12081	7
1371	ctg11206	50
1372	ctg11442	19
1373	ctg2655	13
1374	ctg12082	2
1375	ctg6323	38
1376	ctg10920	45
1377	ctg10968	51
1378	ctg3070	27
1379	ctg11307	27
1380	ctg10212	14
1381	ctg13	60
1382	ctg12083	8
1383	ctg1302	100
1384	ctg8400	5
1385	ctg10332	25
1386	ctg7957	24
1387	ctg10272	60
1388	ctg3180	5
1389	ctg6066	14
1390	ctg3310	26
1391	ctg12084	2
1392	ctg10615	73
1393	ctg914	62
1394	ctg10389	31
1395	ctg12085	2
1396	ctg3072	16
1397	ctg136	93
1398	ctg1661	65
1399	ctg11858	47
1400	ctg12086	2
1401	ctg10265	15
1402	ctg12087	5
1403	ctg9179	27
1404	ctg2388	50
1405	ctg10828	64
1406	ctg11219	25
1407	ctg12088	4
1408	ctg13883	3
1409	ctg1858	25
1410	ctg10967	17
1411	ctg3921	32
1412	ctg624	22
1413	ctg2866	36
1414	ctg186	210
1415	ctg1466	84
1416	ctg417	61
1417	ctg8941	111
1418	ctg9900	145
1419	ctg3737	108
1420	ctg1794	80
1421	ctg8725	35
1422	ctg10409	67
1423	ctg895	44
1424	ctg12089	6
1425	ctg12090	4
1426	ctg12091	4
1427	ctg11564	16
1428	ctg11228	10
1429	ctg2368	16
1430	ctg142	55
1431	ctg11683	25
1432	ctg437	153
1433	ctg10407	89
1434	ctg1153	33
1435	ctg892	61
1436	ctg5966	47
1437	ctg6137	7
1438	ctg12092	6
1439	ctg3389	26
1440	ctg3247	108
1441	ctg12093	2
1442	ctg1099	71
1443	ctg18547	4
1444	ctg3229	27
1445	ctg803	91
1446	ctg11527	21
1447	ctg1627	32
1448	ctg9036	38
1449	ctg697	70
1450	ctg705	103
1451	ctg12094	7
1452	ctg2311	24
1453	ctg748	21
1454	ctg12095	2
1455	ctg3815	17
1456	ctg4368	30
1457	ctg2786	61
1458	ctg828	72
1459	ctg560	169
1460	ctg12097	6
1461	ctg12098	3
1462	ctg11399	45
1463	ctg729	86
1464	ctg11477	31
1465	ctg12099	5
1466	ctg8832	69
1467	ctg3472	23
1468	ctg631	69
1469	ctg10008	80
1470	ctg8459	18
1471	ctg94	82
1472	ctg732	22
1473	ctg12764	8
1474	ctg6584	59
1475	ctg12100	3
1476	ctg1213	127
1477	ctg10029	27
1478	ctg4840	10
1479	ctg1547	71
1480	ctg1720	23
1481	ctg12101	5
1482	ctg12102	3
1483	ctg6564	40
1484	ctg3462	57
1485	ctg7473	61
1486	ctg12103	2
1487	ctg5235	38
1488	ctg7269	27
1489	ctg2567	85
1490	ctg12104	6
1491	ctg8881	13
1492	ctg12105	4
1493	ctg10360	30
1494	ctg1390	56
1495	ctg6615	15
1496	ctg12106	4
1497	ctg8120	20
1498	ctg3426	37
1499	ctg12107	8
1500	ctg12108	2
1501	ctg3749	78
1502	ctg1020	27
1503	ctg6630	42
1504	ctg12109	4
1505	ctg8589	27
1506	ctg1413	24
1507	ctg2333	47
1508	ctg11765	24
1509	ctg10788	30
1510	ctg11311	13
1511	ctg4937	96
1512	ctg16374	5
1513	ctg1251	81
1514	ctg6549	87
1515	ctg960	160
1516	ctg3561	90
1517	ctg11199	16
1518	ctg10655	25
1519	ctg10921	33
1520	ctg414	110
1521	ctg2393	69
1522	ctg9144	24
1523	ctg6464	87
1524	ctg12110	4
1525	ctg2907	75
1526	ctg10854	33
1527	ctg3890	91
1528	ctg10792	19
1529	ctg10406	48
1530	ctg4804	8
1531	ctg5584	11
1532	ctg10170	76
1533	ctg3073	38
1534	ctg10230	116
1535	ctg2812	45
1536	ctg1715	75
1537	ctg12111	4
1538	ctg11352	44
1539	ctg12112	5
1540	ctg11435	51
1541	ctg331	36
1542	ctg10829	65
1543	ctg450	123
1544	ctg11574	14
1545	ctg12113	2
1546	ctg12114	5
1547	ctg12115	4
1548	ctg781	68
1549	ctg11580	12
1550	ctg12116	3
1551	ctg12117	6
1552	ctg10074	50
1553	ctg10126	16
1554	ctg10843	11
1555	ctg891	27
1556	ctg2790	58
1557	ctg10355	9
1558	ctg12118	2
1559	ctg801	124
1560	ctg101	155
1561	ctg10057	30
1562	ctg11525	32
1563	ctg1399	31
1564	ctg6774	40
1565	ctg2930	38
1566	ctg11453	41
1567	ctg1152	95
1568	ctg5118	44
1569	ctg12119	3
1570	ctg69	77
1571	ctg11239	67
1572	ctg2018	13
1573	ctg403	128
1574	ctg4927	23
1575	ctg12120	5
1576	ctg11334	15
1577	ctg30	47
1578	ctg11102	39
1579	ctg5574	64
1580	ctg12121	6
1581	ctg261	68
1582	ctg10619	77
1583	ctg2926	69
1584	ctg1487	21
1585	ctg10204	67
1586	ctg1016	22
1587	ctg11480	15
1588	ctg12122	4
1589	ctg1011	63
1590	ctg12123	3
1591	ctg8254	43
1592	ctg1723	33
1593	ctg10579	40
1594	ctg15	53
1595	ctg12124	6
1596	ctg2813	140
1597	ctg12125	2
1598	ctg10425	24
1599	ctg12126	3
1600	ctg11855	8
1601	ctg8996	15
1602	ctg10189	7
1603	ctg12127	5
1604	ctg5520	52
1605	ctg271	65
1606	ctg12128	7
1607	ctg1751	63
1608	ctg12129	3
1609	ctg12130	2
1610	ctg1069	59
1611	ctg1647	81
1612	ctg9523	55
1613	ctg1096	49
1614	ctg7803	81
1615	ctg745	43
1616	ctg9895	9
1617	ctg10897	18
1618	ctg10822	51
1619	ctg10506	19
1620	ctg3018	16
1621	ctg12131	6
1622	ctg435	63
1623	ctg6530	34
1624	ctg10884	35
1625	ctg1303	30
1626	ctg10624	23
1627	ctg7531	50
1628	ctg12132	2
1629	ctg1727	39
1630	ctg12133	2
1631	ctg11766	30
1632	ctg765	23
1633	ctg7758	123
1634	ctg10385	29
1635	ctg12134	2
1636	ctg12135	5
1637	ctg10016	58
1638	ctg810	40
1639	ctg11056	45
1640	ctg12136	5
1641	ctg12137	6
1642	ctg213	29
1643	ctg11464	29
1644	ctg353	46
1645	ctg12138	5
1646	ctg1028	17
1647	ctg12139	2
1648	ctg168	144
1649	ctg12140	4
1650	ctg10001	15
1651	ctg12141	3
1652	ctg10733	26
1653	ctg3467	73
1654	ctg10223	17
1655	ctg1808	44
1656	ctg89	30
1657	ctg3063	24
1658	ctg1507	20
1659	ctg10031	49
1660	ctg14972	10
1661	ctg9973	36
1662	ctg135	23
1663	ctg16280	2
1664	ctg9938	95
1665	ctg12142	2
1666	ctg9931	93
1667	ctg10061	15
1668	ctg10690	20
1669	ctg5797	85
1670	ctg12143	4
1671	ctg441	37
1672	ctg8635	23
1673	ctg11851	10
1674	ctg11027	29
1675	ctg3246	25
1676	ctg9904	60
1677	ctg12144	6
1678	ctg10908	33
1679	ctg8585	40
1680	ctg763	71
1681	ctg10511	7
1682	ctg12145	8
1683	ctg10164	73
1684	ctg12146	3
1685	ctg835	152
1686	ctg12147	3
1687	ctg12148	4
1688	ctg7935	73
1689	ctg12149	4
1690	ctg946	41
1691	ctg10338	19
1692	ctg10607	8
1693	ctg2269	92
1694	ctg1554	44
1695	ctg2461	13
1696	ctg6332	14
1697	ctg12150	2
1698	ctg955	105
1699	ctg2552	25
1700	ctg12151	3
1701	ctg7875	32
1702	ctg5199	58
1703	ctg404	91
1704	ctg357	16
1705	ctg4199	38
1706	ctg12152	3
1707	ctg10187	110
1708	ctg58	21
1709	ctg12153	4
1710	ctg9040	28
1711	ctg3152	29
1712	ctg10853	24
1713	ctg10952	26
1714	ctg11691	37
1715	ctg12154	4
1716	ctg12155	3
1717	ctg3867	41
1718	ctg10660	50
1719	ctg4537	78
1720	ctg12156	3
1721	ctg1169	63
1722	ctg12157	4
1723	ctg12158	3
1724	ctg12159	3
1725	ctg2660	17
1726	ctg3892	35
1727	ctg2518	50
1728	ctg4187	26
1729	ctg73	70
1730	ctg12160	10
1731	ctg2799	23
1732	ctg8890	5
1733	ctg2045	21
1734	ctg2383	55
1735	ctg3858	31
1736	ctg10276	59
1737	ctg9059	17
1738	ctg4904	64
1739	ctg10348	14
1740	ctg850	77
1741	ctg651	46
1742	ctg12161	3
1743	ctg12162	4
1744	ctg3086	34
1745	ctg504	71
1746	ctg247	24
1747	ctg8394	14
1748	ctg7520	201
1749	ctg4334	40
1750	ctg10240	41
1751	ctg12163	3
1752	ctg12164	7
1753	ctg7284	35
1754	ctg10855	47
1755	ctg4559	4
1756	ctg12165	2
1757	ctg10309	21
1758	ctg2320	52
1759	ctg12166	8
1760	ctg4222	26
1761	ctg11273	40
1762	ctg4509	22
1763	ctg12167	2
1764	ctg12168	3
1765	ctg285	69
1766	ctg12169	5
1767	ctg5066	25
1768	ctg5313	18
1769	ctg2502	7
1770	ctg11663	27
1771	ctg1063	59
1772	ctg3742	31
1773	ctg12170	3
1774	ctg10176	71
1775	ctg549	30
1776	ctg389	164
1777	ctg12171	2
1778	ctg10424	24
1779	ctg2642	12
1780	ctg10085	62
1781	ctg9911	83
1782	ctg995	29
1783	ctg10723	23
1784	ctg10672	10
1785	ctg3719	62
1786	ctg862	57
1787	ctg11165	17
1788	ctg10175	21
1789	ctg575	67
1790	ctg10305	28
1791	ctg9980	13
1792	ctg225	143
1793	ctg4648	28
1794	ctg1211	65
1795	ctg2125	7
1796	ctg12172	2
1797	ctg2150	54
1798	ctg1381	30
1799	ctg9896	40
1800	ctg10812	22
1801	ctg757	39
1802	ctg350	53
1803	ctg2501	24
1804	ctg50	93
1805	ctg10490	20
1806	ctg6312	36
1807	ctg2992	41
1808	ctg528	37
1809	ctg731	57
1810	ctg12173	4
1811	ctg125	88
1812	ctg2242	93
1813	ctg3113	73
1814	ctg12174	2
1815	ctg567	12
1816	ctg10370	20
1817	ctg8151	39
1818	ctg12175	6
1819	ctg12176	6
1820	ctg11221	2
1821	ctg10936	39
1822	ctg600	22
1823	ctg2810	72
1824	ctg12177	3
1825	ctg2073	40
1826	ctg7671	85
1827	ctg4977	66
1828	ctg3517	20
1829	ctg4109	35
1830	ctg12178	5
1831	ctg12179	3
1832	ctg10159	32
1833	ctg10380	33
1834	ctg10351	65
1835	ctg405	68
1836	ctg3140	19
1837	ctg9987	89
1838	ctg12180	4
1839	ctg10259	26
1840	ctg5995	45
1841	ctg8201	69
1842	ctg12181	4
1843	ctg10426	7
1844	ctg10821	17
1845	ctg1002	8
1846	ctg12182	7
1847	ctg12183	5
1848	ctg1532	9
1849	ctg11028	40
1850	ctg4649	42
1851	ctg11452	39
1852	ctg423	36
1853	ctg583	12
1854	ctg5191	56
1855	ctg12184	7
1856	ctg2283	39
1857	ctg2848	60
1858	ctg12185	2
1859	ctg638	56
1860	ctg925	54
1861	ctg10611	35
1862	ctg11018	26
1863	ctg12186	8
1864	ctg12187	7
1865	ctg11243	25
1866	ctg249	21
1867	ctg4958	51
1868	ctg10965	62
1869	ctg2780	14
1870	ctg11637	24
1871	ctg10453	53
1872	ctg4624	12
1873	ctg10702	97
1874	ctg12188	3
1875	ctg11609	12
1876	ctg12189	5
1877	ctg5000	41
1878	ctg18810	3
1879	ctg257	22
1880	ctg11403	44
1881	ctg713	40
1882	ctg9949	87
1883	ctg5735	24
1884	ctg12190	14
1885	ctg10152	49
1886	ctg11854	17
1887	ctg10593	43
1888	ctg2065	20
1889	ctg586	17
1890	ctg301	15
1891	ctg11367	37
1892	ctg10019	96
1893	ctg10055	20
1894	ctg10218	132
1895	ctg9011	54
1896	ctg12191	5
1897	ctg12192	6
1898	ctg1258	108
1899	ctg12193	3
1900	ctg3276	18
1901	ctg12194	4
1902	ctg1119	15
1903	ctg12195	2
1904	ctg619	41
1905	ctg2074	11
1906	ctg246	89
1907	ctg12196	4
1908	ctg10167	97
1909	ctg937	41
1910	ctg9991	18
1911	ctg11757	6
1912	ctg11287	32
1913	ctg4196	26
1914	ctg11425	24
1915	ctg8393	8
1916	ctg4862	44
1917	ctg1134	70
1918	ctg11298	10
1919	ctg5925	39
1920	ctg10630	34
1921	ctg5018	38
1922	ctg12197	3
1923	ctg2295	20
1924	ctg10958	16
1925	ctg12198	3
1926	ctg768	18
1927	ctg471	81
1928	ctg9976	34
1929	ctg2522	57
1930	ctg9081	20
1931	ctg944	36
1932	ctg10101	34
1933	ctg760	41
1934	ctg3217	11
1935	ctg328	70
1936	ctg12199	4
1937	ctg11605	38
1938	ctg1905	63
1939	ctg2740	76
1940	ctg4410	48
1941	ctg10238	19
1942	ctg4353	39
1943	ctg544	136
1944	ctg291	89
1945	ctg11006	35
1946	ctg12200	4
1947	ctg3046	36
1948	ctg5297	21
1949	ctg10066	16
1950	ctg10054	19
1951	ctg5238	28
1952	ctg12201	5
1953	ctg10844	87
1954	ctg11782	23
1955	ctg9421	19
1956	ctg7057	57
1957	ctg12202	3
1958	ctg1247	91
1959	ctg4563	37
1960	ctg3716	33
1961	ctg7034	44
1962	ctg10937	13
1963	ctg10845	27
1964	ctg2994	35
1965	ctg10929	64
1966	ctg1066	22
1967	ctg6272	8
1968	ctg323	70
1969	ctg531	24
1970	ctg2000	70
1971	ctg12203	4
1972	ctg12204	6
1973	ctg4663	50
1974	ctg12205	2
1975	ctg10926	28
1976	ctg334	14
1977	ctg2036	58
1978	ctg9539	36
1979	ctg1357	15
1980	ctg12206	4
1981	ctg3622	18
1982	ctg10642	120
1983	ctg10856	5
1984	ctg10011	153
1985	ctg7258	40
1986	ctg11802	13
1987	ctg3914	36
1988	ctg12207	2
1989	ctg11140	45
1990	ctg313	24
1991	ctg5432	38
1992	ctg12208	7
1993	ctg10050	30
1994	ctg11531	32
1995	ctg5006	50
1996	ctg3236	38
1997	ctg12209	7
1998	ctg12210	4
1999	ctg11490	62
[truncated: 11,042 more rows]
